# Supplementary material for: Effects of Low-Temperature and Low-Salt Fermentation on the Physicochemical Properties and Volatile Flavor Substances of Chinese Kohlrabi Using Gas Chromatography–Ion Mobility Spectrometry
Source: MDPI journal article supplement (doi:10.3390/fermentation9020146), 2023-02-01
Supplement: s1 [file s1]

**Table S1.** Volatile flavor substances in LSCK and HSCK.

| No       | Compound name and classification            | CAS        | Peak volume/a.u.              |                               |
|----------|---------------------------------------------|------------|-------------------------------|-------------------------------|
|          |                                             |            | LSFK                          | HSFK                          |
| Esters   |                                             |            |                               |                               |
| A1       | Ethyl dihydrocinnamate-D                    | 103-36-6   | 116.97 ± 15.57 <sup>a</sup>   | 60.06 ± 0.16 <sup>b</sup>     |
| A1       | Ethyl dihydrocinnamate-M                    | 103-36-6   | 1420.15 ± 96.75 <sup>a</sup>  | 314.23 ± 44.93 <sup>b</sup>   |
| A2       | Propyl butanoate                            | 105-66-8   | 257.07 ± 14.07 <sup>a</sup>   | 295.13 ± 12.22 <sup>b</sup>   |
| A3       | Propyl propanoate                           | 106-36-5   | 2444.00 ± 39.07 <sup>a</sup>  | 2705.59 ± 40.48 <sup>b</sup>  |
| A4       | Methyl hexanoate                            | 106-70-7   | 639.67 ± 49.51 <sup>a</sup>   | 549.96 ± 17.14 <sup>b</sup>   |
| A5       | Butyl butanoate                             | 109-21-7   | 344.84 ± 25.86 <sup>a</sup>   | 256.63 ± 7.85 <sup>b</sup>    |
| A6       | Heptyl acetate                              | 112-06-1   | 311.49 ± 14.15 <sup>a</sup>   | 308.02 ± 9.15 <sup>a</sup>    |
| A7       | Benzyl propionate                           | 122-63-4   | 564.95 ± 25.16 <sup>a</sup>   | 363.40 ± 18.52 <sup>b</sup>   |
| A8       | n-Butyl acetate                             | 123-86-4   | 425.26 ± 7.99 <sup>a</sup>    | 431.37 ± 7.14 <sup>a</sup>    |
| A9       | Ethyl 3-(methylthio)propanoate              | 13327-56-5 | 1108.88 ± 117.08 <sup>a</sup> | 3962.02 ± 215.96 <sup>b</sup> |
| A10      | Acetic acid, (4-methylphenyl)methyl ester-D | 140-39-6   | 925.10 ± 20.08 <sup>a</sup>   | 862.09 ± 25.37 <sup>b</sup>   |
| A10      | Acetic acid, (4-methylphenyl)methyl ester-M | 140-39-6   | 349.47 ± 25.05 <sup>a</sup>   | 311.53 ± 16.42 <sup>a</sup>   |
| A11      | Ethyl acrylate                              | 140-88-5   | 1814.10 ± 78.82 <sup>a</sup>  | 1390.60 ± 3.66 <sup>b</sup>   |
| A12      | Hexyl acetate                               | 142-92-7   | 118.23 ± 11.21 <sup>a</sup>   | 70.66 ± 1.65 <sup>b</sup>     |
| A13      | Butyl 2-methylbutanoate                     | 15706-73-7 | 378.50 ± 6.56 <sup>a</sup>    | 530.07 ± 27.39 <sup>b</sup>   |
| A14      | Propionic acid hexyl ester                  | 2445-76-3  | 201.53 ± 15.89 <sup>a</sup>   | 191.37 ± 7.47 <sup>a</sup>    |
| A15      | Amyl acetate                                | 328-63-7   | 91.38 ± 7.66 <sup>a</sup>     | 133.06 ± 2.27 <sup>b</sup>    |
| A16      | (Z)-3-Hexenyl acetate                       | 3681-71-8  | 123.68 ± 12.24 <sup>a</sup>   | 62.16 ± 3.30 <sup>b</sup>     |
| A17      | Ethyl levulinate                            | 539-88-8   | 44.39 ± 3.22 <sup>a</sup>     | 186.91 ± 7.18 <sup>b</sup>    |
| A18      | Isobutyl butyrate                           | 539-90-2   | 359.99 ± 14.86 <sup>a</sup>   | 321.92 ± 10.04 <sup>b</sup>   |
| A19      | Isobutyl propionate                         | 540-42-1   | 104.00 ± 6.09 <sup>a</sup>    | 153.75 ± 2.60 <sup>b</sup>    |
| A20      | Ethyl 3-hydroxybutanoate                    | 5405-41-4  | 718.67 ± 36.43 <sup>a</sup>   | 502.39 ± 7.55 <sup>b</sup>    |
| A21      | Allyl isothiocyanate                        | 57-06-7    | 901.94 ± 32.01 <sup>a</sup>   | 980.69 ± 13.90 <sup>b</sup>   |
| A22      | 2-Furanmethanol                             | 623-19-8   | 1471.31 ± 189.05 <sup>a</sup> | 582.86 ± 9.29 <sup>b</sup>    |
| A23      | Methyl butanoate                            | 623-42-7   | 348.77 ± 35.69 <sup>a</sup>   | 313.82 ± 7.16 <sup>a</sup>    |
| A24      | Ethyl acetoacetate propylene glycol ketal   | 6290-17-1  | 1848.20 ± 111.97 <sup>a</sup> | 929.44 ± 37.52 <sup>b</sup>   |
| A25      | Isopropyl 2-methylbutanoate                 | 66576-71-4 | 495.26 ± 8.47 <sup>a</sup>    | 334.76 ± 10.22 <sup>b</sup>   |
| A26      | δ-Heptanolide-D                             | 713-95-1   | 325.86 ± 15.43 <sup>a</sup>   | 261.23 ± 17.88 <sup>b</sup>   |
| A26      | δ-Heptanolide-M                             | 713-95-1   | 2365.47 ± 151.80 <sup>a</sup> | 954.76 ± 0.39 <sup>b</sup>    |
| A27      | γ-Butyrolactone                             | 96-48-0    | 586.66 ± 35.90 <sup>a</sup>   | 429.28 ± 4.41 <sup>b</sup>    |
| A28      | Ethyl isobutyrate                           | 97-62-1    | 94.02 ± 12.18 <sup>a</sup>    | 153.14 ± 1.00 <sup>b</sup>    |
| A29      | Ethyl lactate-M                             | 97-64-3    | 211.11 ± 16.71 <sup>a</sup>   | 315.40 ± 3.56 <sup>b</sup>    |
| A29      | Ethyl lactate-D                             | 97-64-3    | 527.92 ± 49.44 <sup>a</sup>   | 801.57 ± 8.30 <sup>b</sup>    |
| A30      | Isobutyl isobutyrate                        | 97-85-8    | 645.27 ± 15.92 <sup>a</sup>   | 735.36 ± 27.06 <sup>b</sup>   |
| Alcohols |                                             |            |                               |                               |
| B1       | 2-Methyl-1-pentanol-M                       | 105-30-6   | 180.24 ± 2.16 <sup>a</sup>    | 113.91 ± 3.88 <sup>b</sup>    |
| B1       | 2-Methyl-1-pentanol-D                       | 105-30-6   | 169.69 ± 10.39 <sup>a</sup>   | 52.82 ± 1.99 <sup>b</sup>     |
| B2       | 1-Heptanol                                  | 111-70-6   | 254.51 ± 11.36 <sup>a</sup>   | 108.32 ± 4.30 <sup>b</sup>    |
| B3       | 2-Butoxyethanol                             | 111-76-2   | 222.69 ± 20.10 <sup>a</sup>   | 284.32 ± 14.84 <sup>b</sup>   |
| B4       | 1-Octanol                                   | 111-87-5   | 777.96 ± 72.55 <sup>a</sup>   | 156.22 ± 12.74 <sup>b</sup>   |
| B5       | (Z)-2-Penten-1-ol                           | 1576-95-0  | 227.03 ± 30.76 <sup>a</sup>   | 256.58 ± 9.51 <sup>a</sup>    |
| B6       | Dihydromyrcenol                             | 18479-58-8 | 631.05 ± 5.85 <sup>a</sup>    | 274.98 ± 7.40 <sup>b</sup>    |
| B7       | 2,3-Butanediol                              | 513-85-9   | 65.42 ± 5.51 <sup>a</sup>     | 106.94 ± 3.65 <sup>b</sup>    |
| B8       | 2-Heptanol-M                                | 543-49-7   | 502.50 ± 29.04 <sup>a</sup>   | 399.87 ± 3.38 <sup>b</sup>    |
| B8       | 2-Heptanol-D                                | 543-49-7   | 413.04 ± 16.00 <sup>a</sup>   | 497.44 ± 2.73 <sup>b</sup>    |
| B9       | (E)-3-Hexen-1-ol                            | 544-12-7   | 137.13 ± 13.90 <sup>a</sup>   | 194.11 ± 1.21 <sup>b</sup>    |
| B10      | Linalool oxide                              | 60047-17-8 | 1240.65 ± 116.71 <sup>a</sup> | 1342.43 ± 133.35 <sup>a</sup> |
| B11      | 4-Methylpentanol                            | 626-89-1   | 96.29 ± 7.33 <sup>a</sup>     | 42.57 ± 2.10 <sup>b</sup>     |
| B12      | 2-Hexanol                                   | 626-93-7   | 889.79 ± 48.76 <sup>a</sup>   | 492.74 ± 1.83 <sup>b</sup>    |
| B13      | 2-Propanol                                  | 67-63-0    | 240.76 ± 22.53 <sup>a</sup>   | 300.83 ± 23.65 <sup>b</sup>   |
| B14      | 1-Butanol                                   | 71-36-3    | 929.07 ± 37.13 <sup>a</sup>   | 651.10 ± 7.62 <sup>b</sup>    |
| B15      | Tert-butyl alcohol                          | 75-65-0    | 244.74 ± 24.48 <sup>a</sup>   | 156.95 ± 2.95 <sup>b</sup>    |
| B16      | 3-Methyl-3-buten-1-ol                       | 763-32-6   | 3817.24 ± 59.55 <sup>a</sup>  | 2017.55 ± 0.45 <sup>b</sup>   |
| B17      | 2-Methyl-1-propanol                         | 78-83-1    | 179.14 ± 3.32 <sup>a</sup>    | 583.10 ± 30.17 <sup>b</sup>   |
| B18      | 1-Menthol                                   | 89-78-1    | 228.15 ± 28.08 <sup>a</sup>   | 409.64 ± 10.14 <sup>b</sup>   |
| B19      | 4-Hexen-1-ol                                | 928-927    | 251.72 ± 9.30 <sup>a</sup>    | 269.78 ± 12.66 <sup>a</sup>   |

|     |                                   |            |                               |                               |
|-----|-----------------------------------|------------|-------------------------------|-------------------------------|
| B20 | 2-Hexen-1-ol                      | 928-950    | 381.60 ± 31.13 <sup>a</sup>   | 378.58 ± 10.10 <sup>a</sup>   |
| B21 | 2-Furfurylthiol                   | 98-02-2    | 233.01 ± 13.70 <sup>a</sup>   | 193.49 ± 6.61 <sup>b</sup>    |
|     | Aldehyde                          |            |                               |                               |
| C1  | Benzaldehyde                      | 100-52-7   | 549.31 ± 36.30 <sup>a</sup>   | 161.66 ± 0.36 <sup>b</sup>    |
| C2  | Heptanal                          | 111-71-7   | 155.51 ± 3.28 <sup>a</sup>    | 272.18 ± 2.46 <sup>b</sup>    |
| C3  | Vanillin                          | 121-33-5   | 1959.19 ± 83.28 <sup>a</sup>  | 1416.84 ± 25.33 <sup>b</sup>  |
| C4  | Benzene acetaldehyde-D            | 122-78-1   | 473.19 ± 34.25 <sup>a</sup>   | 317.32 ± 0.55 <sup>b</sup>    |
| C4  | Benzene acetaldehyde-M            | 122-78-1   | 1486.31 ± 178.84 <sup>a</sup> | 1741.84 ± 20.36 <sup>a</sup>  |
| C5  | 2-Methylpentanal                  | 123-15-9   | 979.00 ± 12.83 <sup>a</sup>   | 982.94 ± 12.26 <sup>a</sup>   |
| C6  | trans-2-Pentenal                  | 1576-87-0  | 63.77 ± 2.72 <sup>a</sup>     | 182.89 ± 3.31 <sup>b</sup>    |
| C7  | (E)-2-Nonenal                     | 18829-56-6 | 356.51 ± 17.80 <sup>a</sup>   | 331.89 ± 13.65 <sup>a</sup>   |
| C8  | (E)-2-Octenal                     | 2548-87-0  | 833.70 ± 36.59 <sup>a</sup>   | 2521.04 ± 268.55 <sup>b</sup> |
| C9  | 3-Methylbutanal                   | 590-86-3   | 1203.09 ± 58.71 <sup>a</sup>  | 1112.97 ± 12.15 <sup>a</sup>  |
| C10 | (Z)-4-Heptenal                    | 6728-31-0  | 135.38 ± 3.03 <sup>a</sup>    | 105.98 ± 0.69 <sup>b</sup>    |
| C11 | Salicylaldehyde                   | 90-02-8    | 846.91 ± 21.83 <sup>a</sup>   | 533.32 ± 26.71 <sup>b</sup>   |
| C12 | Furfural                          | 98-01-1    | 285.26 ± 4.06 <sup>a</sup>    | 226.11 ± 1.88 <sup>b</sup>    |
| C13 | (E,E)-2,4-Hexadienal              | 142-83-6   | 222.12 ± 21.58 <sup>a</sup>   | 126.37 ± 5.02 <sup>b</sup>    |
|     | Ketones                           |            |                               |                               |
| D1  | 4,5-Dihydro-3(2H)-thiophenone-D   | 1003-04-9  | 1966.82 ± 44.49 <sup>a</sup>  | 294.48 ± 4.27 <sup>b</sup>    |
| D1  | 4,5-Dihydro-3(2H)-thiophenone-M   | 1003-04-9  | 411.58 ± 16.94 <sup>a</sup>   | 204.22 ± 1.06 <sup>b</sup>    |
| D2  | 3-Octanone                        | 106-68-3   | 1449.09 ± 37.25 <sup>a</sup>  | 992.62 ± 1.90 <sup>b</sup>    |
| D3  | 2-Pentanone                       | 107-87-9   | 1206.35 ± 167.50 <sup>a</sup> | 453.76 ± 35.28 <sup>b</sup>   |
| D4  | Dihydro-5-methyl-2(3H)-Furanone-D | 108-29-2   | 146.54 ± 20.49 <sup>a</sup>   | 113.78 ± 1.69 <sup>a</sup>    |
| D4  | Dihydro-5-methyl-2(3H)-Furanone-M | 108-29-2   | 2435.29 ± 53.44 <sup>a</sup>  | 2788.46 ± 3.70 <sup>b</sup>   |
| D5  | 1-Hydroxy-2-propanone             | 116-09-6   | 715.01 ± 6.77 <sup>a</sup>    | 599.12 ± 32.47 <sup>b</sup>   |
| D6  | Cyclopentanone                    | 120-92-3   | 167.24 ± 23.84 <sup>a</sup>   | 220.55 ± 1.36 <sup>b</sup>    |
| D7  | Mesityl oxide                     | 141-79-7   | 407.98 ± 22.05 <sup>a</sup>   | 528.89 ± 16.30 <sup>b</sup>   |
| D8  | Levo-carvone                      | 6485-40-1  | 196.16 ± 8.81 <sup>a</sup>    | 74.89 ± 3.91 <sup>b</sup>     |
| D9  | 3-Pentanone                       | 96-22-0    | 204.23 ± 6.33 <sup>a</sup>    | 781.67 ± 4.57 <sup>b</sup>    |
| D10 | Dihydro-2(3h)-furanone            | 39700-44-2 | 166.28 ± 17.42 <sup>a</sup>   | 144.25 ± 6.70 <sup>a</sup>    |
|     | Acids                             |            |                               |                               |
| E1  | Butanoic acid                     | 107-92-6   | 1341.66 ± 24.19 <sup>a</sup>  | 993.07 ± 2.65 <sup>b</sup>    |
| E2  | Pentanoic acid                    | 109-52-4   | 145.63 ± 2.25 <sup>a</sup>    | 146.19 ± 2.59 <sup>a</sup>    |
| E3  | Nonanoic acid                     | 112-05-0   | 526.69 ± 10.13 <sup>a</sup>   | 560.59 ± 10.73 <sup>b</sup>   |
| E4  | 2-Methylbutanoic acid-D           | 116-53-0   | 466.68 ± 40.38 <sup>a</sup>   | 177.37 ± 0.15 <sup>b</sup>    |
| E4  | 2-Methylbutanoic acid-M           | 116-53-0   | 132.53 ± 8.94 <sup>a</sup>    | 105.56 ± 0.58 <sup>b</sup>    |
| E5  | 3-Methylbutyric acid              | 503-74-2   | 798.11 ± 57.56 <sup>a</sup>   | 2758.12 ± 46.08 <sup>b</sup>  |
| E6  | Allylacetic acid                  | 591-80-0   | 769.86 ± 57.86 <sup>a</sup>   | 1227.41 ± 59.4 <sup>b</sup>   |
| E7  | 2-Methyl propanoic acid           | 79-31-2    | 622.73 ± 37.28 <sup>a</sup>   | 670.60 ± 8.72 <sup>a</sup>    |
|     | Pyrazines                         |            |                               |                               |
| F1  | 2,6-Dimethylpyrazine              | 108-50-9   | 4074.57 ± 496.24 <sup>a</sup> | 2965.32 ± 85.31 <sup>b</sup>  |
| F2  | Methylpyrazine                    | 109-08-0   | 100.46 ± 6.24 <sup>a</sup>    | 31.37 ± 1.15 <sup>b</sup>     |
| F3  | 2-Ethyl-5-methylpyrazine          | 1336-64-0  | 34.36 ± 4.14 <sup>a</sup>     | 34.91 ± 1.72 <sup>a</sup>     |
| F4  | Ethylpyrazine                     | 13925-00-3 | 418.82 ± 28.78 <sup>a</sup>   | 701.03 ± 4.32 <sup>b</sup>    |
| F5  | 2-Ethyl-3-methyl-Pyrazine         | 15707-23-0 | 24.65 ± 2.52 <sup>a</sup>     | 34.50 ± 2.19 <sup>b</sup>     |
| F6  | 2-Acetylpyrazine                  | 22047-25-2 | 123.93 ± 12.07 <sup>a</sup>   | 55.48 ± 4.23 <sup>b</sup>     |
| F7  | 2-Acetyl-3-methylpyrazine         | 23787-80-6 | 1358.74 ± 77.37 <sup>a</sup>  | 1801.20 ± 10.14 <sup>b</sup>  |
| F8  | 3-sec-Butyl-2-methoxypyrazine     | 24168-70-5 | 1855.95 ± 48.94 <sup>a</sup>  | 326.82 ± 17.71 <sup>b</sup>   |
|     | Ethers                            |            |                               |                               |
| G1  | 1,2-Dimethoxyethane               | 110-71-4   | 1305.62 ± 33.23 <sup>a</sup>  | 569.03 ± 11.61 <sup>b</sup>   |
| G2  | Diethylene glycol dimethyl ether  | 111-96-6   | 2216.78 ± 42.05 <sup>a</sup>  | 505.27 ± 19.35 <sup>b</sup>   |
| G3  | Diethyl trisulfide                | 3600-24-6  | 364.11 ± 33.52 <sup>a</sup>   | 291.25 ± 11.56 <sup>b</sup>   |
| G4  | Diallyl sulfide                   | 592-88-1   | 317.87 ± 19.80 <sup>a</sup>   | 400.30 ± 10.49 <sup>b</sup>   |
| G5  | Dimethyl disulfide                | 624-92-0   | 143.03 ± 11.50 <sup>a</sup>   | 445.18 ± 12.46 <sup>b</sup>   |
| G6  | 1-Propene-3-methylthio            | 10152-76-8 | 1166.92 ± 62.20 <sup>a</sup>  | 910.24 ± 2.04 <sup>b</sup>    |
|     | Terpenes                          |            |                               |                               |
| H1  | Limonene                          | 138-86-3   | 283.73 ± 33.16 <sup>a</sup>   | 474.35 ± 60.00 <sup>b</sup>   |
| H2  | α-Terpinolene                     | 586-62-9   | 625.39 ± 24.58 <sup>a</sup>   | 849.94 ± 25.46 <sup>b</sup>   |
| H3  | α-Phellandrene                    | 99-83-2    | 964.52 ± 44.61 <sup>a</sup>   | 1094.98 ± 67.01 <sup>b</sup>  |
| H4  | α-Terpinene                       | 99-86-5    | 52.00 ± 4.68 <sup>a</sup>     | 47.03 ± 1.56 <sup>a</sup>     |
|     | Phenols                           |            |                               |                               |
| I1  | Phenol                            | 108-95-2   | 279.59 ± 4.09 <sup>a</sup>    | 233.92 ± 0.71 <sup>b</sup>    |

|     |                                        |            |                                  |                                 |
|-----|----------------------------------------|------------|----------------------------------|---------------------------------|
| I2  | Carvacrol                              | 499–75–2   | 36,661.62 ± 2066.07 <sup>a</sup> | 32,995.09 ± 639.11 <sup>b</sup> |
| I3  | p-Methyl guaiacol                      | 93–51–6    | 279.56 ± 10.75 <sup>a</sup>      | 275.22 ± 12.86 <sup>a</sup>     |
|     | Nitriles                               |            |                                  |                                 |
| J1  | Hexanenitrile                          | 628–73–9   | 4624.50 ± 233.94 <sup>a</sup>    | 2751.70 ± 51.16 <sup>b</sup>    |
| J2  | 3-Butenenitrile                        | 109–75–1   | 1142.26 ± 82.58 <sup>a</sup>     | 409.49 ± 2.82 <sup>b</sup>      |
|     | Others                                 |            |                                  |                                 |
| K1  | N,N-Diethylethanamine                  | 121–44–8   | 679.17 ± 45.36 <sup>a</sup>      | 463.76 ± 1.39 <sup>b</sup>      |
| K2  | Aniline                                | 62–53–3    | 239.25 ± 15.28 <sup>a</sup>      | 56.20 ± 0.76 <sup>b</sup>       |
| K3  | Tetrahydrothiophene                    | 110–01–0   | 6282.35 ± 260.70 <sup>a</sup>    | 469.77 ± 5.11 <sup>b</sup>      |
| K4  | 1,4-Dioxan                             | 123–91–1   | 1965.58 ± 187.11 <sup>a</sup>    | 1193.13 ± 118.99 <sup>b</sup>   |
| K5  | <i>cis</i> -2,4-Dimethyl-1,3-Dioxolane | 3390–12–3  | 285.77 ± 11.95 <sup>a</sup>      | 823.20 ± 1.72 <sup>b</sup>      |
| K6  | 2-Heptylfuran                          | 3777–71–7  | 445.09 ± 9.25 <sup>a</sup>       | 328.29 ± 10.22 <sup>b</sup>     |
| K7  | 3-Ethylpyridine                        | 536–78–7   | 1258.28 ± 177.24 <sup>a</sup>    | 630.38 ± 40.16 <sup>b</sup>     |
| K8  | 2-Methyl-4-propyl-1,3-oxathiane        | 59323–76–1 | 1175.41 ± 165.08 <sup>a</sup>    | 80.47 ± 3.12 <sup>b</sup>       |
| K9  | N-Nitroso-morpholine                   | 59–89–2    | 492.33 ± 36.16 <sup>a</sup>      | 533.76 ± 12.88 <sup>a</sup>     |
| K10 | 4-Methylthiazole                       | 693–95–8   | 225.40 ± 26.43 <sup>a</sup>      | 569.48 ± 23.35 <sup>b</sup>     |

Different superscript letters in the same row indicate significant differences ( $p < 0.05$ ).
